# Supplementary material for: Altered Peripheral Amino Acid Profile Has Pivotal Role in Controlling Pro- and anti- Inflammatory Responses in Celiac Disease
Source: Preprints.org preprint supplement (doi:10.20944/preprints202309.1099.v1), 2023-09-19
Supplement: Supplementary file 1 [file supplementary]

**Supplementary tables**

| Reverse primer | Forward primer | *Gene Symbol* |
| --- | --- | --- |
| 5'-AGCACTTCCTCCAGAGGTTTG-3' | 5'-TACATGCCCAAGAAGGCCAC-3' | *IL-2* |
| 5'-TTCCTGTCGAGCCGTTTCAG-3' | 5'-CTTTGCTGCCTCCAAGAACAC-3' | *IL-4* |
| 5'- AAGTGGGTGCAGCTGTTCTC -3 | 5'- AAGAAGGCATGCACAGCTCA -3' | *IL-10* |
| 5'-AACCTCGCCTCCTTTGTGAC-3' | 5'-GTGAGGTCTTAGGCTCTGGC-3' | *IL-12* |
| 5'-GCACAACTCCGGTGACATCAA-3' | 5'-CAATTCCTGGCGATACCTCAG-3' | *TGFβ* |
| 5'-ATGTCGGATGGATGAAACCC-3' | 5'-CCAGCGTACTCCAAAGATTC-3' | *B2M* |

**Table S1.** Sequence of primers used in real-time PCR

**Supplementary Figures**


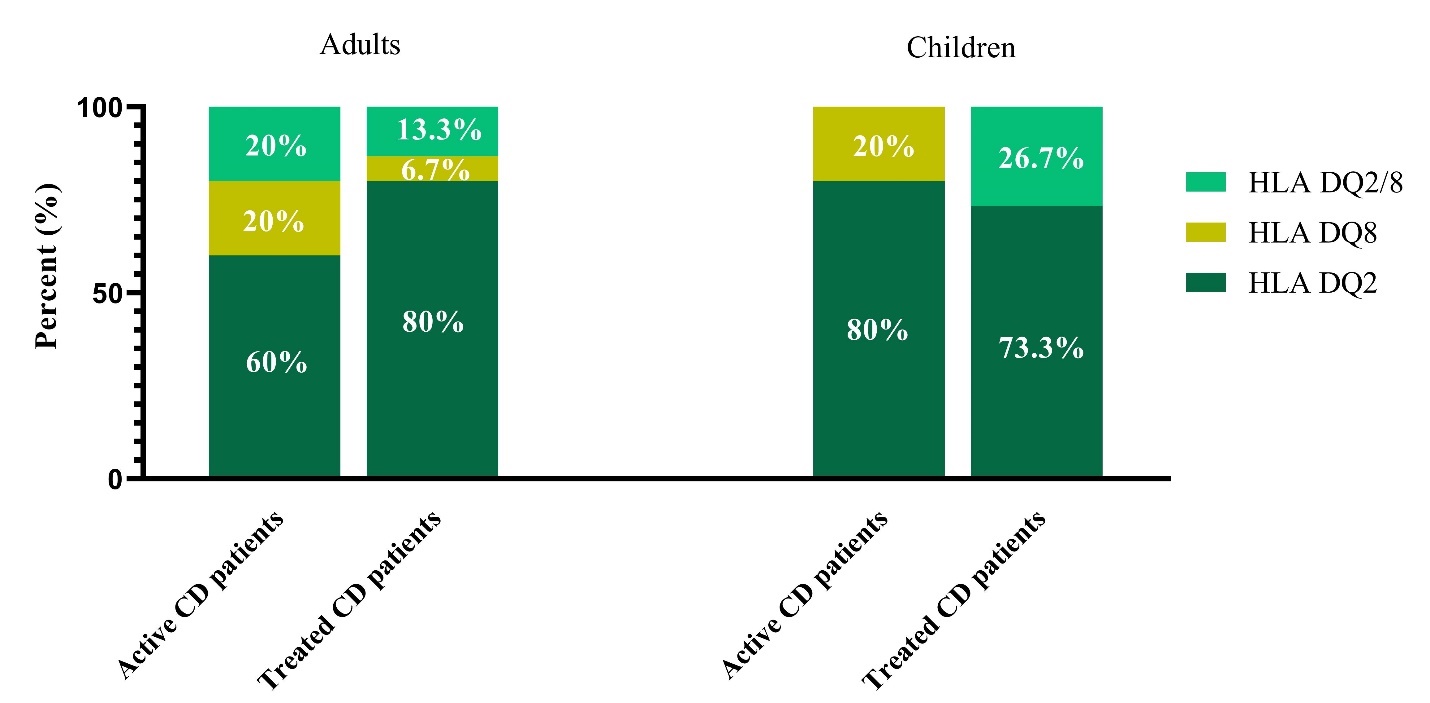
 **Figure S1.** HLA status of studied patients


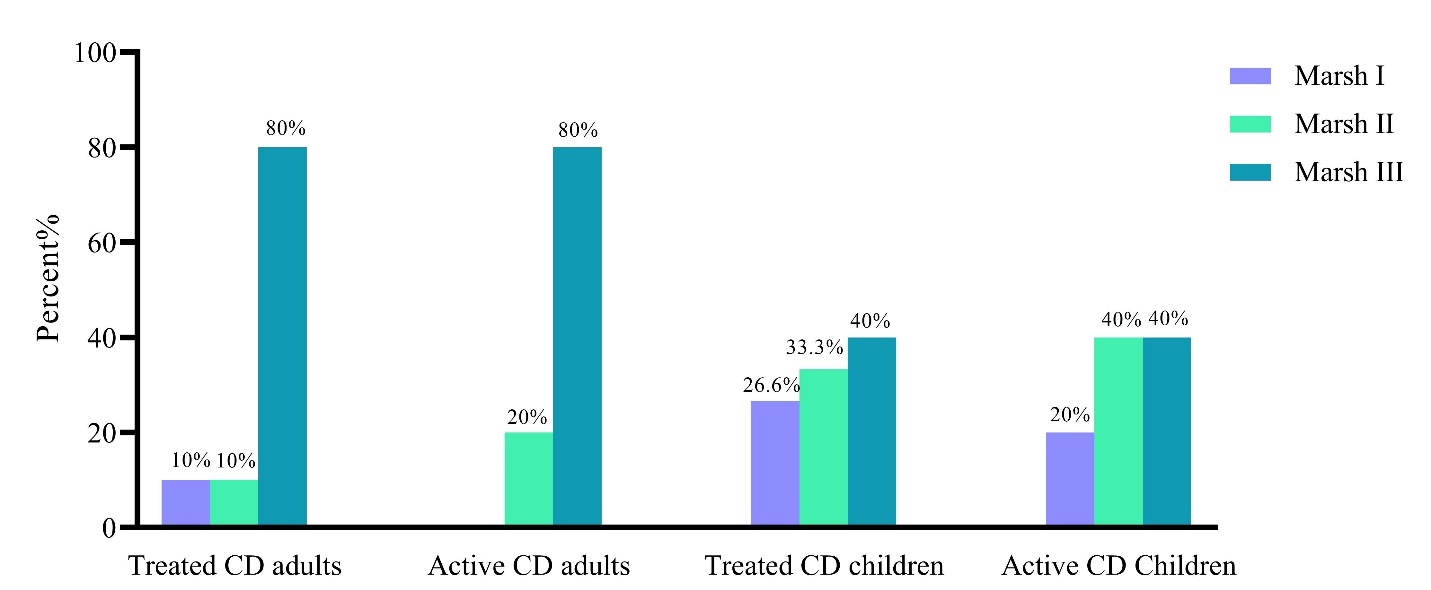


**Figure S2.** Histological classification of studied patients
